# Supplementary material
Source: MDPI journal article supplement (https://www.mdpi.com/2077-0472/10/12/600)
Supplement: s1 [file s1 › Figure S1.pdf]

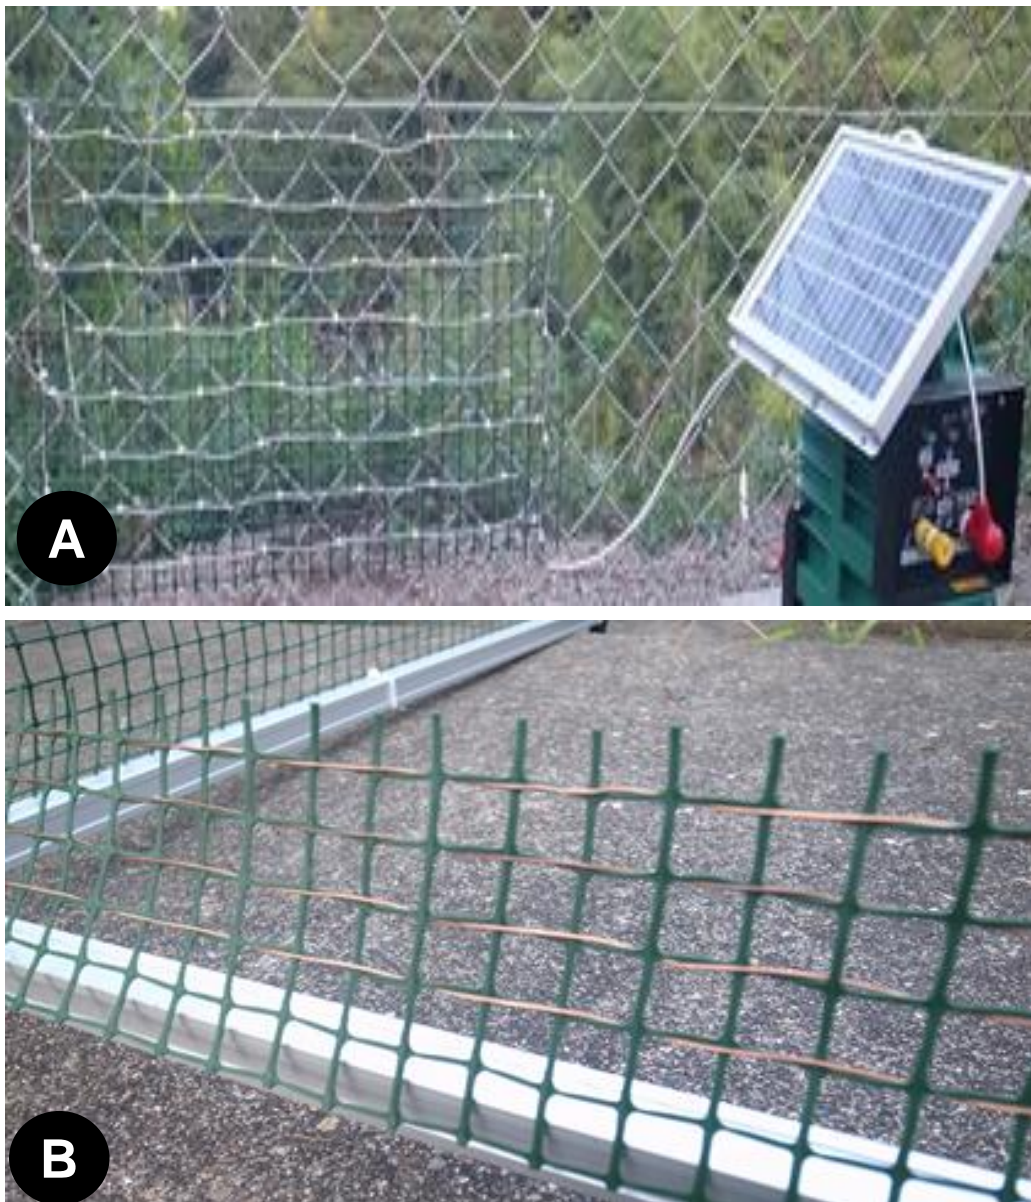

**Figure S1.** A simplified pulsed arc discharge exposure (SE-PAD) and a solar cell-driven pulse-type voltage generator (A). A SE-PAD attached to an aluminium plate to control vines creeping along the ground (B).
