# Supplementary material
Source: MDPI journal article supplement (https://www.mdpi.com/2077-0472/10/12/600)
Supplement: s1 [file s1 › Figure S2.pdf]

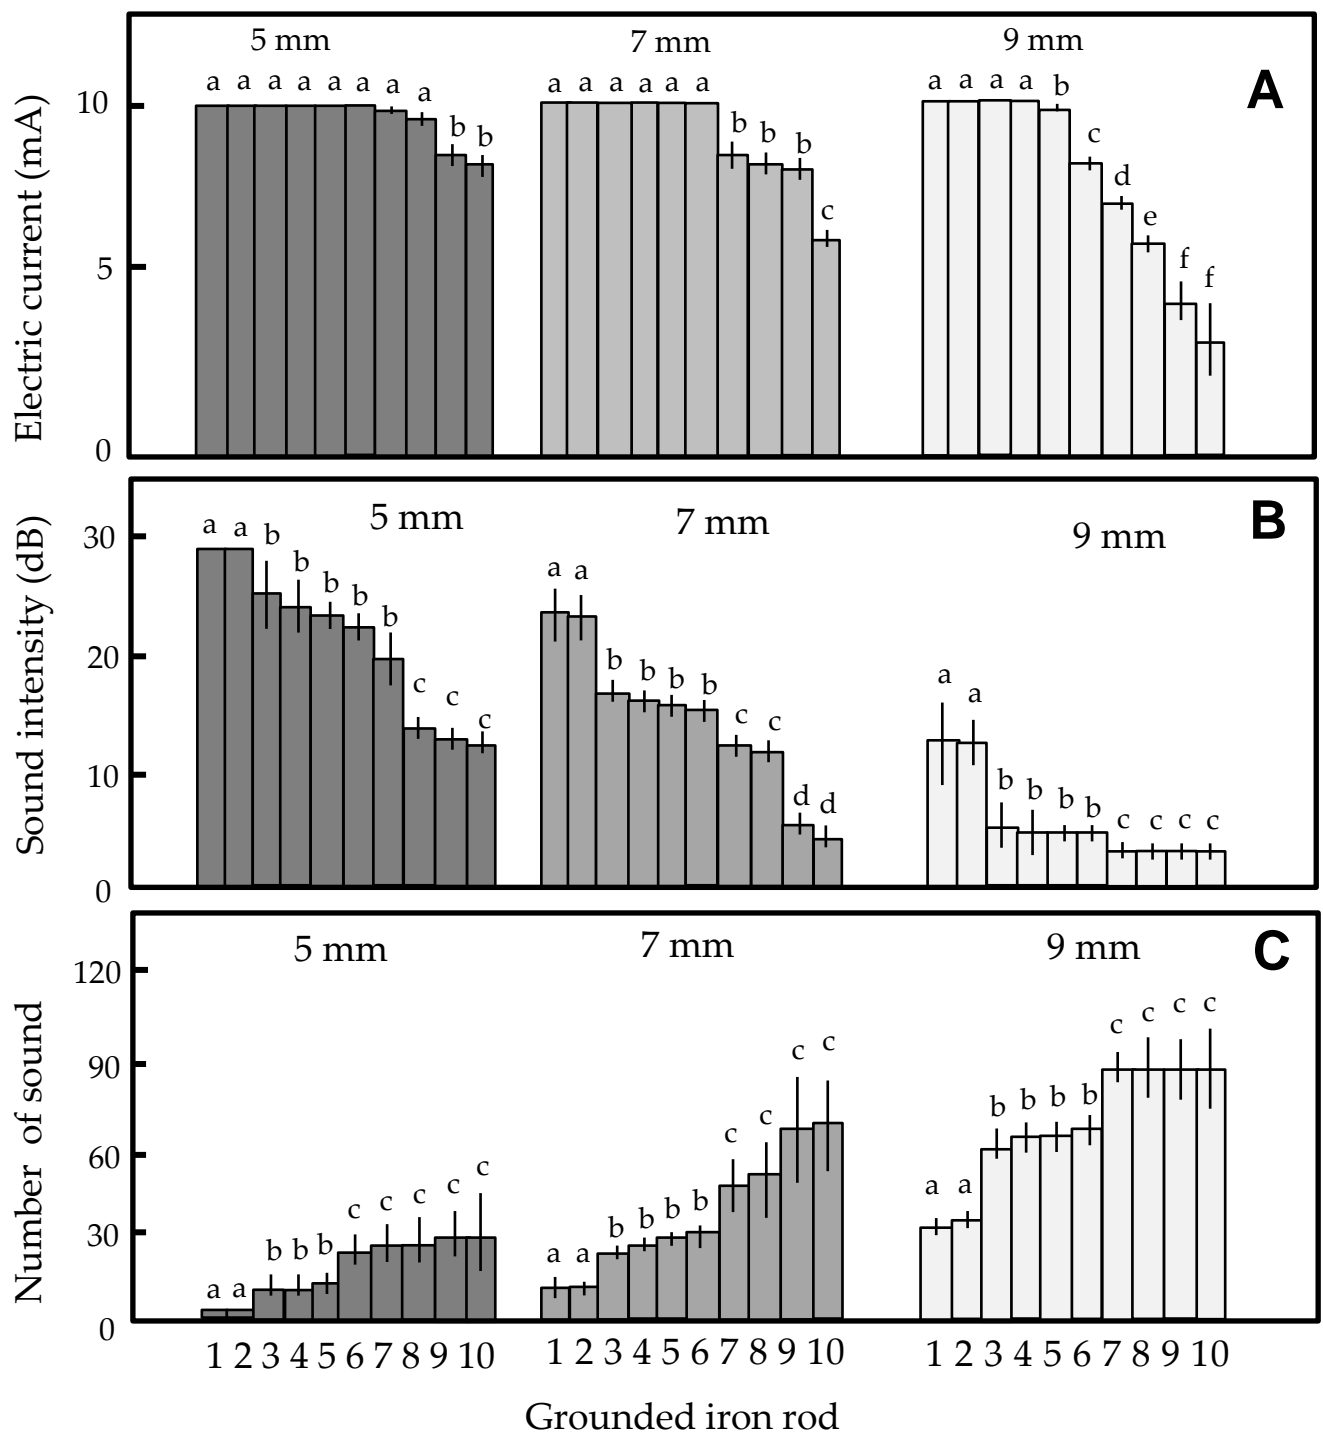

**Figure S2:** Effects of change in D-AG on the generation of an electric current on a vine (A), and the intensity (B) and frequency (C) of the arc discharge sound.

A kudzu vine was placed on 10 iron rods of the ladder-shaped arc discharge exposor (LE-PAD), and the distance between the charged iron rod (CIR) and the apical tip of the vine (D-AG, arc discharge-causing distance) was adjusted to 5, 7, and 9 mm. One of the 10 iron rods was linked to a grounded line, and the CIR was pulse-charged at -10 kV (2 min). Twenty vine samples were used for each D-AG and each grounded iron rod, and means and standard deviations were calculated from five replicates of the experiments. Letters (a-f) in each column indicate significant differences ( $p < 0.05$ ) determined by Tukey's test,
